# Supplementary material
Source: PubMed Central journal article supplement (PMC4216200)

## Simultaneous

### Atomic force microscopy

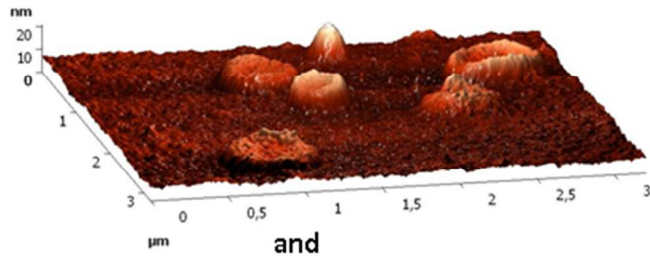

and

### Kelvin probe force microscopy

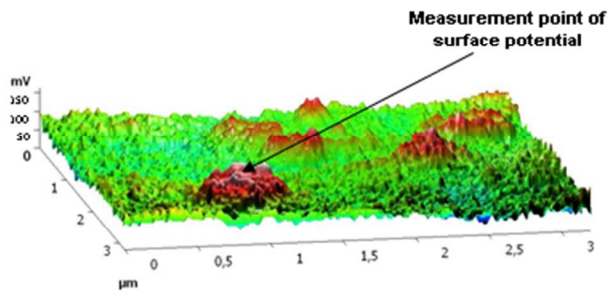

## Experimental setup

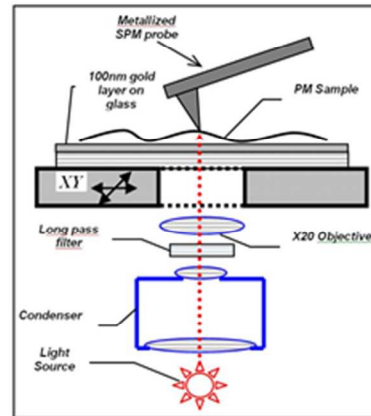

### Surface potential measurement in the dark and upon illumination

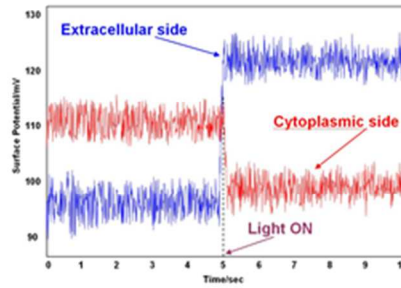

Supplement: jp502885s_si_001.pdf [file jp502885s_si_001.pdf]
